# Supplementary material for: Factors associated with self-care behavior in patients with pre-dialysis or dialysis-dependent chronic kidney disease
Source: PLoS One. 2022 Oct 13;17(10):e0274454. doi: 10.1371/journal.pone.0274454 (PMC9560058; doi:10.1371/journal.pone.0274454)
Supplement: S1 Dataset — (XLSX) [file pone.0274454.s001.xlsx]

## Sheet: Data set
No.	Sex	Age	Age_2	Edu	Living	Working	Smoker	BMI	Satage of KD	Duration of Dx	#Meds	#Meds_2	DCI	Hb	Hb_2	Ca	Ca_2	Phos	Phos_2	Protein	Protein_2	BUN_PRE	Bun_2	Creatinine	Creat_2	GFR	GFR_2	KtVurea	KtV_2	CKDSC_Med	CKDSC_diet	CKDSC_exer	CKDSC_smo	CKDSC_bp	CKDSC_Total	HPS_HealthcareProviderSupport	HSI_HavingSufficientInfo	AMH_ActivelyManagingHealth	SS_SocialSupport	CA_CriticalAppraisal	AE_ActiveEngagementwithHealthcareProvider	NHS_NavigatingTheHealthcareSystem	FHI_AbilitytofindGoodHealthInfo	UHI_ReadingandUnderstandingHealthInfo
1	1	37	1	2	2	1	2	22.4913	1	1	4	1	1	16.7	1	9.4	1	3.3	2	7.4	1	23	1	0.98	1	86.54	1	#NULL!	#NULL!	4.75	3	3	4	4	3.73333	3	3	2.4	3	2.8	4.2	4.17	4.2	4
3	1	52	1	1	2	1	2	16.6311	1	3	10	3	2	14.6	1	9.2	1	3	2	7.6	1	10	1	0.94	1	84.61	1	#NULL!	#NULL!	3	2	2	2	2	2.26667	2.5	1.75	2	2.4	2.4	2	1.67	1.8	1.8
4	1	49	1	1	1	2	2	31.6049	1	2	4	1	2	13.5	1	8.9	1	4.5	1	7.7	1	10	1	0.93	1	86.34	1	#NULL!	#NULL!	5	2.25	3.33333	3	3	3.4	3	2.25	2.4	3	2.6	3.8	4.17	4	4.2
5	1	52	1	2	2	1	2	25.7117	1	1	2	1	2	13.6	1	9.4	1	3.7	1	7.3	1	14	1	1.56	2	46.97	2	#NULL!	#NULL!	4.75	3	3	3.5	3	3.53333	2	2.25	2	2	2.6	3.4	3	3	3.4
6	1	62	1	1	2	1	2	#NULL!	1	3	7	2	2	15	1	9.6	1	3.4	2	7.6	1	11	1	1.05	1	71.81	1	#NULL!	#NULL!	5	2.5	1.66667	5	5	3.66667	2.75	2.75	2.8	3	3	4	4	4	4
7	2	39	1	1	2	2	2	16.3668	2	2	7	2	2	9.5	2	9.6	1	6.3	2	6.7	1	51	2	13.73	2	3	2	#NULL!	#NULL!	5	2.75	3	4	4	3.73333	2.75	2.25	2.8	2.8	2.6	2.6	2.67	2.8	2.8
8	2	62	1	1	1	2	2	20.202	2	2	9	2	2	9.5	2	8.7	1	4.3	1	6.2	2	45	2	6.07	2	7.03	2	#NULL!	#NULL!	4.25	2.75	3.66667	5	3	3.66667	2	2.5	2.6	2.4	2.2	1.8	2.5	3	3.2
9	1	54	1	2	2	2	2	16.9172	2	3	12	3	2	11.4	1	7.6	2	4.7	1	6.9	1	55	2	11.33	2	4.75	2	#NULL!	#NULL!	4	3	1	3.5	2	2.8	3	3	2.4	3	3	4	3.83	4	4
10	1	32	1	2	1	1	2	35.9963	2	3	8	2	2	10.4	2	9.5	1	7.8	2	7	1	51	2	17.37	2	3.21	2	#NULL!	#NULL!	4	3.25	2	3.5	3.5	3.26667	2	2.25	2.4	3	2.6	5	5	5	5
11	2	61	1	1	2	2	2	27.2545	2	3	7	2	3	10.1	2	8.6	1	7	2	6.9	1	65	2	12.29	2	3.12	2	#NULL!	#NULL!	5	3.5	1.66667	5	4	3.8	2.75	2.5	2.8	2.4	2.2	4.2	4.17	3.2	3.2
12	1	58	1	1	2	1	2	25.0695	2	1	10	3	2	11.3	1	7.7	2	4	1	6.1	2	63	2	5.99	2	9.73	2	#NULL!	#NULL!	5	1	1	3	1	2.33333	3	2.25	3	3	2.8	2.8	3.83	2.8	3.6
13	1	51	1	2	2	2	1	27.8147	2	2	10	3	2	10.9	2	8.9	1	6.2	2	7.2	1	55	2	9.19	2	6.09	2	#NULL!	#NULL!	4	3	2	2	3	2.93333	2.5	2.5	2.8	3.6	2.8	3	2.83	3.8	3.2
14	1	54	1	2	2	1	2	22.7839	2	2	10	3	2	8.7	2	7.9	2	6.5	2	6.8	1	97	2	14.77	2	3.48	2	1.55	1	5	3.5	3.5	4	4	4.07143	2.5	3	2.2	3.6	1.8	4.5	3.75	3.8	3.8
15	1	38	1	1	2	2	2	23.3343	2	1	4	1	2	10.4	2	8.1	2	5.9	2	6.7	1	71	2	12.02	2	4.74	2	1.54	1	4.75	4	3.66667	5	4.5	4.33333	3.75	4	3.4	4	3.8	4.2	4.17	3.8	3.6
16	1	59	1	2	2	1	1	26.9827	2	2	11	3	2	11	1	7.9	2	6.2	2	6.7	1	76	2	12.04	2	4.35	2	1.35	1	4.75	3	4	2.5	4	3.73333	2.75	3	3	3	2.2	3.4	3.33	3.6	3.6
17	1	59	1	1	2	2	2	24.8491	2	2	6	2	2	12	1	8.3	2	4.6	1	6.7	1	74	2	10.81	2	4.9	2	1.27	1	4	2	2.33333	2	3	2.73333	2	2	2.2	3	2	2.2	2	1	1.8
18	2	63	1	1	2	2	2	22.5832	2	3	12	3	2	10.2	2	7.9	2	6.4	2	6.2	2	59	2	8.91	2	4.87	2	2.12	1	4.75	3.25	2	5	4	3.73333	3.25	2	2	3.2	2.2	2.2	2.5	1.4	2.4
19	2	45	1	2	1	2	2	21.8963	2	2	7	2	2	9	2	9.3	1	5.4	1	7.3	1	79	2	10.73	2	3.88	2	1.65	1	5	3	5	4	4.5	4.26667	2.75	2.5	2.8	1.8	2.8	2.2	2.83	2.8	3.4
20	2	41	1	2	1	2	2	18.5066	2	3	7	2	2	11.4	1	9.5	1	5.9	2	7.4	1	58	2	8.64	2	5.13	2	2.11	1	4.25	1.5	1	4.5	3	2.73333	2.75	3	2	2.6	2.8	2.4	3.67	3.8	3.6
21	2	46	1	2	2	2	2	16.8886	2	3	9	2	2	9.4	2	8.8	1	4.1	1	7	1	46	2	9.48	2	4.45	2	2.1	1	5	3	4	4.5	4	4.06667	3	3	3	3.2	2.8	4	4	4	3.8
22	1	74	2	2	2	2	2	21.9531	2	2	15	3	2	11.1	1	8.2	2	5.3	1	6.8	1	73	2	11.18	2	4.52	2	1.49	1	5	4.75	4.66667	5	4.5	4.8	3.75	3	3.8	3.6	3.4	3.2	3.17	2.8	3.2
23	2	49	1	1	2	2	2	18.4042	2	3	5	2	2	9.2	2	8.4	2	3.9	1	6.3	2	41	2	8.12	2	5.28	2	1.97	1	4.5	3.5	4	3	4	3.86667	2.75	2.5	2.4	2.8	2.2	4	3.5	3.2	3.4
24	1	49	1	1	1	2	2	26.7712	2	3	7	2	2	10.1	2	8.1	2	6.2	2	6.3	2	48	2	12.54	2	4.6	2	1.29	1	4.75	2.5	3	4.5	5	3.8	2	2	3	2	2.8	3	2.83	3	3.2
25	2	53	1	2	2	1	2	18.0889	2	3	6	2	2	9.8	2	8.2	2	4.9	1	6.5	1	60	2	8.31	2	5.04	2	2.11	1	1.5	2	5	5	1.5	2.8	3	3	3.4	3.2	3	4	4	4	4
26	1	48	1	2	2	1	2	26.0771	2	1	11	3	2	10.8	2	8.7	1	5	1	6.9	1	#NULL!	#NULL!	11.63	2	4.7	2	1.35	1	4.5	4	3	3.5	4	3.86667	3	2.5	2.4	3	2.6	4	3	3.6	3.8
27	2	41	1	1	1	1	2	28.4196	2	2	10	3	2	11.5	1	8.4	2	4	1	7.3	1	#NULL!	#NULL!	6.37	2	7.18	2	1.57	1	4.75	3.25	1	4	4.5	3.46667	3.25	2.5	2.8	2.8	3	3.8	3.5	3.8	3.2
28	2	50	1	1	2	2	2	19.5213	2	2	5	2	2	10.6	2	7.3	2	8.5	2	6.4	1	#NULL!	#NULL!	12.4	2	3.21	2	1.89	1	3.5	3.75	3	5	5	3.86667	3	3	2.4	3	2.8	3.6	4	3.8	3.8
29	1	64	1	1	2	2	2	22.3289	2	3	5	2	2	11.7	1	8.8	1	3	2	7	1	#NULL!	#NULL!	5.76	2	9.97	2	1.53	1	4	2.75	2	3	3.5	3.06667	2	2	2	2.2	2	1.2	1.5	1.2	1.6
30	2	75	2	1	1	2	2	27.5134	2	2	5	2	3	9.8	2	8.8	1	5.4	1	6.5	1	#NULL!	#NULL!	10.02	2	3.77	2	3.16	1	5	2.75	4.66667	5	4	4.2	2.25	2.5	2.4	3	2.8	3.2	3.83	3.8	4.2
31	2	65	2	1	2	2	2	17.0771	2	3	5	2	2	8.7	2	7.1	2	4.6	1	7	1	#NULL!	#NULL!	8.17	2	4.96	2	2.09	1	4.5	3.25	5	3.5	4	4.06667	2.75	3	3	3	2.8	2.2	2.33	2.6	2.4
32	2	54	1	2	2	1	2	29.7629	2	2	12	3	3	11.4	1	8.2	2	6.5	2	6.1	2	#NULL!	#NULL!	11.51	2	3.36	2	1.26	1	4.5	2.75	2.33333	4.5	4.5	3.6	2.75	2.25	2.4	2.8	2.8	2.2	2.67	2.6	2.8
33	1	69	2	1	2	2	2	18.3655	2	2	10	3	2	10.4	2	8.2	2	4.9	1	6.3	2	#NULL!	#NULL!	7.19	2	7.65	2	1.32	1	3.75	4	1.33333	4	4	3.4	2.5	2	2.4	2.6	2.4	2.4	1.83	1.8	2
34	1	62	1	1	2	1	2	30.3906	2	2	4	1	2	11.4	1	8.6	1	7.8	2	7.1	1	#NULL!	#NULL!	14.28	2	3.52	2	1.16	2	4.75	3.75	5	5	5	4.6	2.25	2.25	3	2.6	2.6	3	3	2.2	2.6
35	2	69	2	1	2	2	2	24.8907	2	2	12	3	2	9.4	2	7.8	2	4.9	1	6.6	1	#NULL!	#NULL!	7.43	2	5.43	2	1.86	1	4.5	2.25	3	4	4	3.46667	3.25	2.25	2.6	2.8	3	1.8	1.5	1.8	1.8
36	1	61	1	1	2	1	2	21.7547	2	2	6	2	3	11.2	1	8.3	2	8.7	2	6.1	2	#NULL!	#NULL!	8.33	2	6.62	2	1.4	1	4.75	2.75	2	3	4	3.33333	2.25	3	3	2.4	2.8	3.2	3.17	3	3.6
37	1	67	2	1	2	2	2	24.0235	2	2	13	3	2	10.1	2	8.4	2	6.3	2	6.9	1	#NULL!	#NULL!	9.74	2	5.41	2	1.26	1	5	4.5	3.66667	3	4.5	4.26667	3	1.25	1.6	2.6	1.4	2	1.83	1.8	1.8
38	1	54	1	1	2	2	2	26.0201	2	3	7	2	2	11.5	1	8.1	2	5.4	1	6.6	1	#NULL!	#NULL!	11.71	2	4.59	2	1.18	2	4.5	2.75	3.66667	4.5	5	3.93333	2.75	2.25	2	2.8	2	3	2.83	2.6	2.6
39	1	46	1	1	1	2	2	19.3807	2	2	10	3	2	10.9	2	8.2	2	5.9	2	8.6	2	#NULL!	#NULL!	9.97	2	5.66	2	1.3	1	4.75	3.75	3	4	3	3.8	3	3	3	3.2	3	3	3	3	3
40	1	82	2	1	2	2	2	18.4775	2	3	5	2	2	10.8	2	7.8	2	4.9	1	6.9	1	#NULL!	#NULL!	12.24	2	4.21	2	1.76	1	5	1.25	1.66667	1.5	1.5	2.4	1.5	2	2	2.2	2	3	3.33	4	3.2
41	2	63	1	1	2	2	2	24.3672	2	2	9	2	2	12.3	1	8.1	2	6.6	2	6.5	1	#NULL!	#NULL!	5.66	2	7.6	2	1.64	1	4.75	2.75	3.66667	5	5	4.06667	2.5	2.25	3.2	3.4	3	2.4	2.33	1.6	3
42	2	57	1	1	2	2	2	23.2735	2	3	7	2	2	8.9	2	91	2	6.3	2	6.1	2	#NULL!	#NULL!	10.06	2	3.98	2	1.9	1	4.5	3.75	3	5	4	4	3	2.75	2.4	3	3	3.8	3.33	3	4
43	1	76	2	1	2	2	2	23.044	2	2	7	2	3	10.5	2	8.2	2	5.9	2	7.2	1	#NULL!	#NULL!	11.6	2	3.5	2	1.54	1	5	3.25	5	5	5	4.53333	2	2	2.6	3.4	1.6	3.8	3.33	3	4.2
44	2	49	1	1	2	2	2	37.3738	2	3	13	3	2	9.4	2	10.5	2	5.9	2	7.2	1	#NULL!	#NULL!	11.84	2	3.4	2	1.34	1	4.75	2.5	4	4.5	4	3.86667	3	2.75	2.6	2.8	3	3.6	3.67	3.2	3.4
45	1	60	1	2	2	2	2	23.954	2	3	6	2	2	12	1	7.7	2	3.1	2	7.1	1	#NULL!	#NULL!	11.3	2	4.64	2	1.34	1	3.75	1.75	1	3.5	1.5	2.33333	2	2.75	2.2	2.8	1.8	3.4	3	3	3.6
46	2	38	1	1	2	2	2	18.9774	2	3	4	1	2	11	1	8.2	2	4.2	1	6.8	1	#NULL!	#NULL!	10.74	2	4.01	2	2.11	1	4.5	3	3	4	5	3.8	3	3.25	3	3.6	3	5	4.83	5	5
47	2	47	1	1	2	2	2	19.1111	2	3	7	2	2	11	1	8.3	2	4.7	1	6.4	1	#NULL!	#NULL!	10.15	2	4.1	2	2.3	1	4.75	3.25	1	5	4	3.53333	2.5	2	2	2	2.4	3.2	2.83	2.8	3
48	1	63	1	1	1	2	1	24.9202	2	3	7	2	2	11.7	1	8.1	2	3.6	1	6.3	2	#NULL!	#NULL!	9.42	2	5.69	2	1.37	1	4.25	1.25	1.33333	1	2.5	2.2	3	2.25	1.6	2.2	2	3.6	2.67	2.6	3.6
49	1	65	2	2	2	2	2	25.2305	2	2	4	1	2	9.9	2	8.2	2	7.6	2	6.2	2	#NULL!	#NULL!	12.8	2	3.9	2	1.41	1	4.25	2.75	3.66667	4.5	4.5	3.8	3	2.25	3	2.6	2.6	3.2	2.5	2.8	3
50	2	50	1	1	1	2	2	21.6731	2	2	9	2	2	9.2	2	8.7	1	5.2	1	6.4	1	#NULL!	#NULL!	6.82	2	6.43	2	1.34	1	4.5	2.75	3	3	3	3.33333	2.5	2	2.2	2.8	2.2	2.4	2	2.2	2.6
51	1	88	2	2	2	2	2	24.4118	2	3	0	1	2	10.6	2	8.3	2	6.9	2	7	1	#NULL!	#NULL!	8.8	2	5.73	2	0.84	2	4.75	5	3	3.5	2.5	4	3	2.5	2.6	3	2.6	4.6	4.33	4.2	4.4
52	1	75	2	1	2	2	2	26.6406	2	3	9	2	2	11.7	1	8.1	2	5	1	7.4	1	#NULL!	#NULL!	12.21	2	4.06	2	1.64	1	4.75	1	1.66667	4.5	4	3	2.25	2.25	2.8	2.8	2.6	2.4	2.33	2.4	2.6
53	1	65	2	1	2	2	2	24.6875	2	2	2	1	2	11.2	1	7.8	2	4.7	1	6.9	1	#NULL!	#NULL!	6.74	2	8.32	2	1.24	1	5	2.5	5	5	5	4.33333	3	2	2.8	3.4	2.2	3.4	2.83	1.6	3
54	1	79	2	1	1	1	2	22.3094	2	2	6	2	2	9.2	2	7.2	2	4.5	1	6.2	2	#NULL!	#NULL!	9.56	2	5.34	2	1.36	1	4.75	3	4.33333	5	4.5	4.2	1.5	2	1.6	2.6	1.6	2.6	2	2	2.2
55	1	55	1	1	2	2	2	25.9909	2	2	4	1	3	9.8	2	8.5	1	4.1	1	6.3	2	#NULL!	#NULL!	10.76	2	4.83	2	1.51	1	4.75	5	3.66667	4.5	4	4.46667	2.5	2	2.8	2	2.4	2.8	2.17	2.4	2.2
56	1	66	2	1	2	2	2	22.7734	2	3	7	2	2	10.2	2	8.9	1	5.6	2	6.4	1	#NULL!	#NULL!	10.12	2	5.17	2	1.67	1	5	1.75	2	3.5	5	3.33333	3	1.75	2	3	2	2.2	1.83	1.6	1.8
57	1	68	2	2	2	2	2	19.4671	2	3	5	2	2	9.4	2	7.8	2	6.6	2	6.2	2	#NULL!	#NULL!	12.19	2	4.16	2	1.43	1	5	4	4.33333	4.5	5	4.53333	3.25	3.25	3.2	3.2	3.2	3.8	4	3.8	3.8
58	2	87	2	1	1	2	2	23.4667	2	2	14	3	2	10.1	2	7.9	2	7.3	2	5.9	2	#NULL!	#NULL!	7.6	2	4.72	2	1.62	1	5	2	4.33333	5	5	4.06667	3	1.75	2.6	2.6	2.4	3.8	2.33	2.2	2.8
59	1	71	2	1	2	2	2	24.6137	2	2	6	2	2	12.4	1	7.6	2	3	2	6.3	2	#NULL!	#NULL!	11.6	2	4.35	2	1.62	1	4.75	3	1	3	4.5	3.26667	3.5	1.5	1.4	2.8	1.4	3.4	1.83	1.6	2
60	2	75	2	1	2	2	2	25.6889	2	2	8	2	2	10.3	2	7.9	2	6.9	2	7.1	1	#NULL!	#NULL!	9.78	2	3.89	2	1.8	1	5	3.5	3	5	5	4.2	3	2.5	2.8	3	3	3.8	3.5	3.6	3.4
61	2	57	1	1	1	2	2	21.2113	2	3	6	2	2	10.5	2	8.5	1	7.4	2	6.8	1	#NULL!	#NULL!	11.4	2	3.45	2	1.84	1	5	3	5	5	5	4.46667	2.75	1.25	3	3	2	2.6	1.67	2.2	1.8
62	1	57	1	2	1	2	2	23.0546	2	2	15	3	3	10.2	2	7.9	2	11.1	2	7	1	#NULL!	#NULL!	11.8	2	4.45	2	1.16	2	4.25	3.25	4	4.5	4	3.93333	3	3	2.8	3	2.8	3.8	3.67	3.8	3.8
63	1	79	2	1	2	2	2	22.6843	2	2	11	3	2	11	1	7.5	2	3.5	1	6.8	1	#NULL!	#NULL!	8.46	2	6.13	2	1.74	1	5	3.5	2	5	3	3.73333	3.5	2.25	2	3.6	2.2	4	4	3.6	4
64	2	54	1	1	2	2	2	30.9766	2	2	6	2	2	11	1	8.3	2	7	2	7.7	1	#NULL!	#NULL!	8.15	2	5.13	2	1.29	1	4	3	1	3	3	2.86667	1.5	2.5	1.2	2.8	2	2.6	3	3	3
65	2	65	2	1	2	2	2	20.2991	2	3	13	3	2	8.8	2	9.5	1	6.8	2	6.6	1	#NULL!	#NULL!	9.78	2	4	2	2.01	1	5	5	3	4	3	4.2	3	3	3	3	3	3.2	4	3.8	3.4
66	1	75	2	2	2	2	2	22.4051	2	3	10	3	2	10.3	2	8.3	2	2.9	2	6.9	1	#NULL!	#NULL!	7.66	2	6.95	2	1.5	1	4.75	3.75	4	5	5	4.4	3	2.75	3	3	3	3	3	3	3
67	1	58	1	1	2	2	2	20.556	2	3	12	3	2	9.8	2	9.1	1	6.9	2	7.4	1	#NULL!	#NULL!	12.86	2	4.03	2	1.32	1	3.75	3	3	3.5	3	3.26667	2.25	2.5	3	2.6	3	3.2	3.5	3.8	3.4
68	2	61	1	1	1	2	2	23.0646	2	3	6	2	2	10	2	9	1	4.3	1	6.8	1	#NULL!	#NULL!	8.7	2	4.64	2	1.83	1	4.5	3	3	5	4.5	3.86667	1.5	2	2.4	2.4	2.6	2	2.5	1.6	1.8
69	2	80	2	1	2	2	2	23.4337	2	2	6	2	3	10.1	2	8.2	2	3.5	1	6.4	1	#NULL!	#NULL!	4.31	2	10.07	2	1.55	1	5	2.75	3	3	5	3.73333	4	3.25	3.4	3	3.2	2.2	2.17	2.2	2.4
70	2	57	1	1	2	2	2	24.8736	2	3	8	2	2	10.5	2	9.7	1	9.3	2	6.1	2	#NULL!	#NULL!	10.86	2	3.66	2	1.71	1	5	3	3	3	3.5	3.6	2.5	2.25	3	3	3	3	2	3	2.6
71	2	69	2	1	2	2	2	21.7278	2	3	14	3	3	10.5	2	7.1	2	4.8	1	6.3	2	#NULL!	#NULL!	7.95	2	5.06	2	1.86	1	5	4.75	4	5	5	4.73333	3.25	2.5	3.2	3	2.4	3.2	2.67	2.6	2.8
72	2	50	1	1	2	2	2	15.8121	2	1	15	3	3	6.8	2	8.1	2	7.4	2	6.7	1	#NULL!	#NULL!	3.48	2	13.92	2	1.31	1	5	5	5	5	5	5	3	2.75	2.8	3	3	3	3	3	3
73	1	58	1	1	2	2	1	25	2	2	7	2	2	10.8	2	8.7	1	6.5	2	6.8	1	#NULL!	#NULL!	12.16	2	4.33	2	1.6	1	5	3.75	4	1	3.5	3.73333	3	2.25	2.6	2.8	2.8	3.8	3	3.2	4
74	2	47	1	1	2	1	2	28.4005	2	1	5	2	2	7.1	2	7.3	2	5.9	2	5.9	2	#NULL!	#NULL!	10.89	2	3.78	2	1.12	2	4	3	3	5	3	3.53333	3	2.5	3	3	3	3.4	3.83	3.6	3.4
75	1	38	1	2	1	1	2	22.8446	2	1	13	3	2	7	2	8	2	7	2	6.2	2	#NULL!	#NULL!	12.89	2	4.38	2	1	2	4.25	3.5	3	4	2.5	3.53333	3	2.25	2.6	2.8	2.8	3.4	3.5	3.8	2.6
76	2	84	2	1	2	2	2	28.4763	2	1	10	3	2	9.6	2	7.8	2	5.1	1	7.3	1	#NULL!	#NULL!	5.28	2	7.74	2	1.45	1	5	4	4.33333	5	3.5	4.4	3.75	2.5	3	3.2	2.4	3.6	3.17	2	2.2
77	1	73	2	1	2	2	2	26.9776	2	2	12	3	2	11	1	8.4	2	4.1	1	7.3	1	#NULL!	#NULL!	6.81	2	8	2	1.23	1	5	2	5	3	5	3.93333	4	3.75	3.8	4	3.8	4.2	4.17	4.2	4.4
78	2	62	1	1	1	2	2	18.5515	2	2	10	3	3	9.9	2	8.1	2	5.5	1	6.6	1	#NULL!	#NULL!	7.44	2	5.54	2	1.68	1	5	4	3	3	3.5	3.86667	3	3	3	2.8	3	3	2.83	3.4	3
79	1	75	2	2	2	2	2	19.308	2	2	9	2	2	10.4	2	7.8	2	5.1	1	6.1	2	#NULL!	#NULL!	9.82	2	5.22	2	1.52	1	5	3.25	4	5	5	4.33333	2.75	2.5	2.6	2.8	2.4	3.8	3.5	3.4	3.6
80	2	85	2	1	1	2	2	23.2105	2	3	5	2	2	10.1	2	9.1	1	3.8	1	6.7	1	85	2	3.36	2	13.04	2	1.81	1	5	4	4.33333	5	1	4.06667	3.25	2.5	2.2	2.8	2.4	4	3.5	3	3.8
81	1	74	2	1	2	2	2	19.7266	2	1	6	2	2	11.3	1	7.3	2	6.8	2	6.3	2	#NULL!	#NULL!	7.04	2	7.7	2	1.6	1	5	2	1	5	5	3.4	3.5	2.5	2.4	3.2	2.8	4	3.83	3.8	3.8
82	1	49	1	1	2	1	2	32.957	2	2	8	2	2	10.2	2	8.2	2	4	1	7.3	1	#NULL!	#NULL!	13.5	2	4.38	2	1.44	1	4.75	3.25	1.66667	5	3	3.53333	3	2.25	2.4	3	2.4	3.8	3.67	4	4
83	2	52	1	1	2	2	2	21.7578	2	3	7	2	2	13.1	1	7.9	2	7.2	2	6.3	2	#NULL!	#NULL!	13.13	2	2.98	2	1.95	1	4.75	2.5	2	5	3	3.4	2.5	1.75	2.2	3	2	3.6	2.83	2	3.6
84	2	74	2	1	2	2	2	22.7666	2	3	7	2	2	11.8	1	8.7	1	6	2	6.1	2	#NULL!	#NULL!	9.24	2	4.16	2	1.95	1	5	2.75	2.66667	5	3	3.66667	3	2	2	3	2.4	2	1.67	1.4	2.6
85	2	44	1	2	2	1	2	31.3281	2	2	10	3	2	9.1	2	7.6	2	5.5	1	6.1	2	#NULL!	#NULL!	13.16	2	3.09	2	1.41	1	4.5	2	1	3	3.5	2.8	2.75	1.5	1.8	2.2	2.6	1.6	2.83	1.8	2.6
86	1	57	1	1	2	1	1	23.4235	2	2	4	1	2	10.4	2	8.8	1	5.7	2	7.1	1	#NULL!	#NULL!	10.72	2	5	2	1.08	2	5	4.5	5	1.5	3.5	4.2	3	2.75	2.6	2.4	2.8	3	3	3	3.4
87	1	34	1	1	2	2	1	22.8374	2	2	10	3	2	10.1	2	7.3	2	6.2	2	5.3	2	#NULL!	#NULL!	8.1	2	7.65	2	1.16	2	3.75	1	1	1	2.5	1.93333	2	1.5	1	3.2	1	1.4	2	2.2	2
88	1	68	2	2	1	1	2	22.8906	2	2	7	2	3	10.9	2	7.6	2	6.5	2	6.8	1	#NULL!	#NULL!	10.7	2	4.84	2	1.47	1	4.75	3.75	3.66667	5	3	4.06667	4	3.75	4	4	4	4	4	4	4
89	1	51	1	2	2	1	1	24.3091	2	1	4	1	2	8.5	2	7.9	2	8.3	2	6.5	1	#NULL!	#NULL!	14.7	2	3.57	2	1.31	1	4.25	3.75	4	1	4.5	3.66667	2	2.25	3	3	2.6	2.4	2.83	3.4	3.2
90	2	71	2	1	2	1	2	20.9781	2	3	12	3	2	11.9	1	8.6	1	7.6	2	6.4	1	#NULL!	#NULL!	10.34	2	3.73	2	1.92	1	5	3.25	1	5	2	3.33333	2.25	2.25	2.8	2.6	2.8	2.4	3.33	1.6	3
91	1	60	1	1	1	2	2	23.03	2	2	7	2	2	10.2	2	7.8	2	6.3	2	6.8	1	#NULL!	#NULL!	9.6	2	5.6	2	1.4	1	5	1.75	1	3	1	2.53333	3	2.75	3	2.8	3	2.4	2.67	2.4	2.8
92	2	73	2	1	1	1	2	31.9531	2	3	7	2	2	11.3	1	8.3	2	7	2	6.7	1	#NULL!	#NULL!	11.27	2	3.42	2	1.45	1	5	5	5	3.5	5	4.8	4	2.25	4	4	2.4	5	4.5	2.8	4.6
93	2	37	1	1	1	1	2	29.7091	2	3	9	2	2	9.5	2	8.5	1	7.4	2	6.7	1	#NULL!	#NULL!	13.92	2	3	2	1.62	1	4.5	2	3	4	3.5	3.33333	2.5	2	2.2	2.8	2.6	3.8	3.17	2.8	3.8
94	1	70	2	1	2	2	2	18.1366	2	3	7	2	2	9.3	2	8.2	2	4.3	1	6.6	1	#NULL!	#NULL!	8.44	2	6.34	2	1.68	1	5	5	1	5	5	4.2	4	4	3.8	4	4	5	4.67	4.6	4.6
95	2	73	2	1	2	2	2	29.5703	2	3	6	2	2	10	2	8.1	2	5	1	7	1	#NULL!	#NULL!	8.66	2	4.5	2	1.47	1	4.75	5	4	5	4	4.6	3	3.25	3	3	2.8	3.8	4	3.8	4
96	1	68	2	2	2	2	2	24.2701	2	2	10	3	2	10.9	2	9.8	1	6.1	2	6.6	1	#NULL!	#NULL!	11.26	2	4.67	2	1.43	1	5	5	3.66667	5	5	4.73333	4	3.5	4	4	3.6	5	4.67	5	5
97	2	71	2	1	2	2	2	20.3144	2	2	14	3	2	9.1	2	8.1	2	6.9	2	6.7	1	#NULL!	#NULL!	8.76	2	4.47	2	2.11	1	5	4.75	4	4	4.5	4.53333	3	3	3	3.4	3	4	3.83	4	3.8
98	1	61	1	2	2	2	2	23.9946	2	3	6	2	2	5.1	2	7.2	2	5.1	1	5.6	2	#NULL!	#NULL!	6.15	2	9.4	2	1.63	1	5	3.25	5	5	5	4.53333	3.75	3	4	4	4	4.4	4.33	4.6	4.4
99	2	88	2	1	2	2	2	26.9185	2	2	8	2	2	9.7	2	8.5	1	5.2	1	6.2	2	#NULL!	#NULL!	8.69	2	3.77	2	1.05	2	5	4.75	1	5	5	4.13333	4	2.5	2.2	3.8	2.4	3.8	3.67	3.6	3
100	2	56	1	1	2	2	2	22.0312	2	3	5	2	2	10.1	2	7.9	2	5.5	1	6.2	2	#NULL!	#NULL!	10.1	2	4.07	2	1.93	1	4.5	2.5	1.33333	5	2	3.06667	2.5	2.25	2	2.8	3	2.8	1.83	2.4	3
101	1	80	2	1	2	2	2	28.3531	2	3	6	2	2	11.5	1	7.7	2	3	2	6.9	1	#NULL!	#NULL!	8.67	2	4.45	2	1.57	1	5	4	2.33333	5	5	4.2	3.75	2.75	2.8	4	3.2	3.8	3	2.4	2.4
102	1	75	2	2	2	2	2	24.1154	2	2	7	2	2	9.3	2	7.6	2	2.7	2	5.8	2	#NULL!	#NULL!	8.4	2	6.25	2	1.33	1	5	3	3.66667	3.5	4	3.86667	3	3	3	3	3	4	4	4	4
103	2	53	1	1	2	2	2	20.9142	2	3	4	1	2	11.7	1	8.6	1	4.5	1	6.4	1	#NULL!	#NULL!	7.63	2	4.9	2	1.67	1	5	2.5	3	3.5	5	3.73333	3	2.5	2.6	3	2.8	4.8	4.17	3.2	3.8
104	2	82	2	1	2	2	2	25.1953	2	2	11	3	2	10.8	2	8.8	1	5.9	2	7	1	#NULL!	#NULL!	8.03	2	4.82	2	1.5	1	5	1.25	3	5	1	3.06667	3	2.75	3	3	3	3.6	3.83	3.8	3.8
105	2	80	2	1	2	2	2	27.8801	2	2	11	3	2	11.4	1	8.1	2	5.9	2	7.1	1	#NULL!	#NULL!	5.51	2	6.55	2	1.34	1	5	3	1	3.5	3.5	3.26667	3	2.75	2.6	3.8	2.6	4	3.33	3	4
106	2	83	2	1	2	2	2	26.6908	2	3	9	2	2	10	2	7.4	2	4.6	1	7.2	1	#NULL!	#NULL!	9.31	2	4.03	2	1.81	1	4.75	3	1	5	1.5	3.13333	3	1	1.4	2.8	1.2	2.6	1	1	1.8
107	2	64	1	1	2	2	2	24.315	2	3	9	2	2	11.2	1	8.8	1	5.7	2	7.2	1	#NULL!	#NULL!	10.21	2	3.34	2	1.52	1	5	2.5	1	5	4.5	3.46667	1.5	1.5	1.8	2.2	1.8	2.2	2.17	2	2
108	1	83	2	2	2	2	2	29.1523	2	2	12	3	2	11.6	1	8.3	2	4.3	1	6.7	1	#NULL!	#NULL!	6.67	2	8.07	2	0.88	2	4.5	5	4.33333	5	5	4.73333	4	3.5	3.8	4	3.8	4.2	4.17	4	4.2
109	1	82	2	1	2	2	1	24.0129	2	1	9	2	2	10	2	8.2	2	4.8	1	6.7	1	#NULL!	#NULL!	4.65	2	11.8	2	1.3	1	5	1.5	2.66667	1	2.5	2.73333	3	2.5	3.2	3	2.8	2.8	1.33	1	1.8
110	2	47	1	1	2	2	2	22.025	2	2	11	3	3	11.5	1	7.9	2	8.3	2	7.2	1	#NULL!	#NULL!	11.75	2	3.48	2	1.76	1	5	5	5	5	5	5	3.25	3	3.8	4	3.2	2.6	2.17	2.4	2.8
111	1	63	1	2	2	2	2	26.853	2	2	8	2	2	12	1	8.4	2	5.3	1	6.5	1	#NULL!	#NULL!	8.73	2	6.19	2	1.41	1	4.75	3.5	3	4	3	3.73333	3	2.25	2.6	2.8	3	3.4	3.67	3	3.2
112	2	54	1	1	2	2	2	20.1953	2	3	9	2	2	11.9	1	8.7	1	5.1	1	6.9	1	#NULL!	#NULL!	8.92	2	4.64	2	1.88	1	4.75	4.5	4	3.5	4.5	4.33333	2.75	2.5	2	3.6	1.8	3.6	2.83	2	2.2
113	1	64	1	1	1	2	2	25.0995	2	2	6	2	2	9.6	2	8.8	1	10.4	2	5.9	2	#NULL!	#NULL!	10.17	2	5.18	2	1.42	1	4.5	2.75	1	3.5	1	2.73333	2.25	2	2	2.6	2	2.8	3.17	2.2	3.8
114	2	58	1	1	2	2	2	19.9792	2	2	10	3	3	10.2	2	8.7	1	4.6	1	6.6	1	#NULL!	#NULL!	8.48	2	4.83	2	2	1	4.75	4.75	5	5	5	4.86667	3	3	3.6	2.8	3.2	4	3.83	3.4	3.8
115	2	53	1	1	2	2	2	20.2848	2	3	4	1	2	11.8	1	9.5	1	6.6	2	6.2	2	#NULL!	#NULL!	10.32	2	3.94	2	1.94	1	5	3.25	1	3	1.5	3	3	2.25	2.6	3.2	2	3.4	3.33	2.4	2.6
116	1	69	2	1	2	1	1	20.3727	2	2	8	2	2	11.5	1	8.3	2	6.5	2	6.6	1	#NULL!	#NULL!	10.16	2	5.12	2	1.23	1	4.25	1.5	1	1	4	2.4	3	3	2	3	2.4	3.8	3.5	2.8	3
117	2	77	2	1	2	2	2	19.8141	2	3	17	3	2	10.6	2	8.2	2	6.9	2	6.6	1	71	2	9.45	2	4.05	2	1.75	1	4.75	4	5	5	5	4.66667	3.25	2.25	3	3	3	4	3.67	3.6	3.6
118	2	75	2	1	2	2	2	23.2258	2	3	17	3	2	11.1	1	7.3	2	7.3	2	5.9	2	41	2	7.91	2	4.97	2	2.03	1	4.75	1.75	1	5	5	3.26667	3	2.25	2.8	2.8	2	4.4	2.33	1.2	3.6
119	1	41	1	2	1	2	2	20.984	2	1	6	2	2	10.6	2	8.1	2	6.9	2	5.8	2	65	2	10.27	2	5.6	2	2.17	1	4.25	3	4	4.5	4.5	3.93333	3.25	3	3	2.2	3	4	4	4	3.8
120	1	65	2	1	2	1	1	20.8203	2	2	10	3	3	10.7	2	9.3	1	7.9	2	7	1	60	2	13.27	2	3.8	2	1.4	1	5	3	1	1	2.5	2.8	2.75	2.75	2.8	2.6	2.6	4	3.67	3.6	3.8
121	1	65	2	2	1	2	1	18.8776	2	3	7	2	3	8.9	2	8.2	2	3.8	1	6.5	1	39	2	7.03	2	7.98	2	1.52	1	5	2	1.66667	2.5	1.5	2.73333	2.5	2.75	2.2	2.8	2.2	3.4	3.67	3.2	3.2
122	1	45	1	1	2	2	1	30.2734	2	3	12	3	2	11.9	1	8.4	2	5	1	6	2	57	2	11.7	2	4.73	2	1.45	1	5	2.75	2.66667	1	4	3.26667	2	2	2	3.2	1.8	3.2	3.5	3	3.4
123	2	61	1	1	2	1	2	22.6008	2	2	2	1	2	10.7	2	8.2	2	6.1	2	6.5	1	72	2	11.77	2	3.28	2	1.87	1	3.5	2.75	3.66667	5	5	3.73333	2.75	2.75	3.2	2.8	3.4	3.2	3.17	3.6	3.2
124	1	63	1	2	2	1	2	29.4023	2	2	4	1	2	10.1	2	7.9	2	6.6	2	7	1	96	2	10.78	2	5.03	2	1.1	2	5	2.75	1.66667	3	2	3.06667	2	2.25	2.2	2.4	2.8	3	3	2.8	2.4
125	1	73	2	1	2	2	2	23.4766	2	2	6	2	2	11.2	1	8.4	2	6.5	2	7.4	1	89	2	11.41	2	4.43	2	1.66	1	5	5	5	5	3.5	4.8	2.75	2.25	2.4	3	2.2	2.6	2.67	1.8	3.4
126	1	81	2	1	2	2	2	27.4609	2	2	5	2	3	11.1	1	9.1	1	5	1	7.1	1	75	2	10.55	2	4.59	2	1.55	1	5	3.25	5	5	5	4.53333	3.25	1.25	2.8	3.8	1.4	3.4	2.83	2.6	4
127	1	73	2	2	2	2	2	25.0967	2	3	5	2	2	10.6	2	8.8	1	4.1	1	6.5	1	65	2	9.41	2	5.53	2	1.44	1	4.75	4	4	3	3.5	4	2.75	3	3	2.8	3	3.6	3.5	3.2	3.4
128	2	60	1	1	2	2	2	18.6056	2	3	6	2	2	10.1	2	10.3	2	5.4	1	6.5	1	74	2	9.12	2	4.4	2	1.87	1	5	3.25	4.33333	4.5	4	4.2	3	3	3	2.8	3	3	3	3.4	3.4
129	1	72	2	2	2	2	2	25.0138	2	1	4	1	2	10	2	8.5	1	5	1	6.2	2	59	2	8.5	2	6.22	2	1.18	2	5	4	4	5	4	4.4	3	3	3	3	3	4	4	4	4
130	2	49	1	2	2	2	2	19.5041	2	2	5	2	2	11.7	1	9	1	9.2	2	7.3	1	115	2	12.38	2	3.24	2	1.67	1	2.75	3	1	3	3.5	2.6	2.25	1.75	1.2	1.8	1.6	2.4	2.17	2.8	2.4
131	2	52	1	1	2	2	2	21.7198	2	3	11	3	2	12.2	1	9.8	1	3.4	2	5.5	2	61	2	10.15	2	4.06	2	2.05	1	5	2.5	3	5	5	3.93333	3.75	2.5	2	3.4	2.6	3.4	3.5	3	3.6
132	2	34	1	2	2	2	2	21.4844	2	2	4	1	2	10.8	2	9.4	1	6.7	2	6.7	1	104	2	11.46	2	3.8	2	1.6	1	4.75	3	3.33333	3	5	3.8	3	3	3	3	3	4.2	4	3.8	4
134	1	51	1	1	1	2	1	18.75	2	3	11	3	2	12.6	1	10.9	2	9.4	2	8.3	1	53	2	10.29	2	5.37	2	1.58	1	3.75	2.75	3.33333	2.5	3.5	3.2	1.5	1.5	1.6	2	1.4	2.2	2	1.8	2.6
135	2	67	2	1	1	2	2	22.7734	2	3	19	3	2	10.5	2	9.7	1	6.4	2	6.3	2	44	2	8.17	2	4.9	2	1.22	1	4.5	5	5	3	5	4.6	3	3	3	2.8	2.6	5	5	5	5
136	1	68	2	2	2	2	2	22.1949	2	3	10	3	2	9.6	2	8.4	2	6.9	2	7.1	1	77	2	9.74	2	5.37	2	1.55	1	3.75	3	2.33333	5	1	3.06667	3.75	2.75	2.8	3.8	3.6	4.6	4.83	4.6	5
137	2	70	2	1	2	2	2	25.4943	2	2	8	2	2	10.2	2	8.4	2	5.6	2	6.3	2	100	2	11.44	2	3.3	2	1.84	1	5	2	5	5	5	4.2	3	2.25	2	3	2.4	2.6	2	1.8	2.4
138	1	56	1	1	2	1	2	26.9238	2	1	12	3	3	10.4	2	8.5	1	3.6	1	6.6	1	58	2	5.99	2	9.73	2	#NULL!	#NULL!	5	4	4	3.5	4	4.2	3	2.5	3	3	3	3.4	3.67	3.2	3.4
139	1	70	2	2	2	1	2	24.999	2	3	9	2	2	9.3	2	7.9	2	5.3	1	7.2	1	54	2	12.66	2	3.96	2	#NULL!	#NULL!	5	3	3	4	3	3.66667	2.5	2.5	2.6	2.4	2.4	2.2	2.33	2.2	2.6
140	1	59	1	2	2	1	2	22.1367	2	3	8	2	2	10.2	2	8	2	6.2	2	7.3	1	66	2	15.97	2	3.14	2	#NULL!	#NULL!	4.75	3.25	4	5	2.5	3.93333	2.5	2.5	3	3	2.8	4	3.83	4	4
141	1	38	1	2	1	1	1	22.3457	2	3	6	2	2	11.5	1	7.5	2	7.5	2	6.3	2	67	2	18.03	2	2.97	2	#NULL!	#NULL!	4	3	1.33333	3	4	3.06667	2	2.75	2.2	2.4	2.4	2.6	3.33	3.8	3.8
142	1	29	1	1	2	2	2	19.7133	2	3	12	3	2	9.6	2	9.2	1	8.6	2	6.7	1	86	2	16.58	2	3.46	2	#NULL!	#NULL!	4.75	3	3	3.5	4	3.66667	3	2.75	2.2	2.4	2.8	4.4	2.83	3.8	3.8
143	1	40	1	2	2	2	2	21.4533	2	3	6	2	2	11.3	1	8.9	1	4.9	1	7.3	1	26	2	8.71	2	6.81	2	#NULL!	#NULL!	4.75	3.25	2	4.5	4	3.66667	3	2.75	2.8	2.8	3.4	3	3.17	3.2	3.4
144	1	39	1	1	2	1	2	30.6366	1	2	6	2	2	11.4	1	8.2	2	4.5	1	6.8	1	47	2	5.67	2	11.23	2	#NULL!	#NULL!	2.75	1	1.33333	5	3	2.33333	2.5	1.5	1.8	2.6	2.4	2.4	1.67	2.2	2.4
145	1	55	1	2	2	1	2	24.1672	1	1	1	1	2	17	1	9.7	1	2.6	2	7.8	1	8	1	0.84	1	95.22	1	#NULL!	#NULL!	4.25	2.25	2.33333	4	2	3	2.25	2.25	2.6	3	2	3.2	3.67	3.8	3.8
146	1	46	1	1	2	1	2	22.6939	1	1	7	2	3	8.9	2	8.8	1	5.5	1	6.6	1	70	2	4.87	2	12.63	2	#NULL!	#NULL!	4	2.75	1.66667	3	2.5	2.86667	1.75	2.75	2	2.6	2.4	3.6	3.67	4	3.8
147	1	80	2	2	2	2	2	25.9107	1	3	6	2	2	14.9	1	10.3	2	3.2	2	8.2	1	14	1	1.21	1	57.7	2	#NULL!	#NULL!	4.5	4	5	5	5	4.6	3	2.25	2.8	3	2.6	2.8	2.67	2.8	2.6
148	2	44	1	1	2	1	2	24.2187	1	1	2	1	1	14.4	1	9.5	1	3.5	1	8	1	16	1	0.89	1	68.9	1	#NULL!	#NULL!	4.75	3.75	3	5	4	4.06667	2.5	2	2.4	2.8	2.4	2.4	2.33	2.4	2.8
149	1	32	1	1	1	1	2	29.3524	1	1	1	1	1	14.5	1	9.7	1	3.1	2	8.1	1	9	1	1.01	1	86.16	1	#NULL!	#NULL!	4.5	3	2	4.5	1.5	3.2	3	2.75	2.6	3.2	3	3.8	4.17	3.8	3.6
150	2	21	1	2	1	1	2	21.5645	1	1	0	1	1	13.9	1	9.4	1	4.7	1	6.9	1	10	1	0.45	1	163.26	1	#NULL!	#NULL!	4.25	1.75	1.66667	4.5	1.5	2.73333	3	2.5	3.2	3.2	2.6	3	4	3.8	3.4
151	2	30	1	2	2	1	2	17.7706	1	1	0	1	1	#NULL!	#NULL!	#NULL!	#NULL!	#NULL!	#NULL!	#NULL!	#NULL!	#NULL!	#NULL!	#NULL!	#NULL!	#NULL!	#NULL!	#NULL!	#NULL!	4.5	2	1.33333	4	1.5	2.73333	2.5	1.75	2.6	2.8	2.8	3.8	3.5	3.8	3.6
153	2	65	2	2	2	1	2	24.315	1	2	3	1	2	10.3	2	8.8	1	3.7	1	6.9	1	61	2	2.28	2	21.5	2	#NULL!	#NULL!	3.25	1	3.66667	5	2.5	2.86667	3	3	3	3	3	2.2	3	2.8	3
154	1	55	1	2	2	1	2	23.5294	1	1	0	1	1	#NULL!	#NULL!	9.3	1	3.1	2	7.6	1	17	1	1.08	1	70.99	1	#NULL!	#NULL!	4.75	3.75	3	4	3.5	3.86667	3	2.5	2.2	2.8	3	3.6	3.67	3.6	3.6
155	1	56	1	2	2	1	2	26.2188	1	3	12	3	2	10.14	2	9.2	1	4	1	6.1	2	32	2	1.58	2	45.43	2	#NULL!	#NULL!	5	1.25	4.66667	3	2	3.26667	1.5	2.25	2.6	2.2	2.4	4.6	4.67	4.8	4.8
156	2	86	2	1	1	2	2	22.6659	1	1	4	1	2	11.4	1	9	1	3.5	1	7.8	1	15	1	1.16	1	44.29	2	#NULL!	#NULL!	5	2.5	3.66667	5	1	3.53333	3.5	3	3	3.4	3.4	2.4	1.5	2	1.8
157	2	34	1	2	2	1	2	21.3382	1	1	0	1	1	12.6	1	9.3	1	3.8	1	7.3	1	9	1	0.47	1	151.69	1	#NULL!	#NULL!	4.25	2	1.66667	4.5	1	2.73333	2.25	2.25	2	3.6	2.6	3.6	3.33	3.4	3
158	1	36	1	1	2	1	2	25.8645	1	1	6	2	2	7.92	2	8.8	1	3.8	1	7.6	1	42	2	2.05	2	36.93	2	#NULL!	#NULL!	4	1	1.66667	5	2	2.6	3	2.25	2	2.6	2.2	3.6	4.5	3.6	3.6
159	1	64	1	1	2	1	2	28.6501	1	3	13	3	2	13.6	1	9.4	1	3.2	2	7	1	21	1	1.36	2	54.41	2	#NULL!	#NULL!	4.75	2.5	1	3	4	3.06667	2	1.5	1.6	2.8	2	2	2.33	1.8	3
160	1	54	1	1	2	1	2	20.2812	1	1	4	1	2	13.2	1	9	1	3.3	2	6.8	1	22	1	1.48	2	46.09	2	#NULL!	#NULL!	5	3.5	4	5	2.5	4.06667	3	2	2.2	3	2.4	4	3.33	3.4	4
162	1	46	1	1	2	1	2	21.9713	1	2	1	1	1	14.2	1	9.3	1	7.7	2	7.4	1	15	1	1.03	1	76.14	1	#NULL!	#NULL!	4.75	2.75	3	3.5	5	3.73333	1.75	2.5	3.2	2.8	3.2	4	4	4	4
163	2	25	1	2	2	1	2	21.3382	1	1	0	1	1	13	1	9.4	1	3.1	2	7.5	1	14	1	0.63	1	115.14	1	#NULL!	#NULL!	4.25	2.5	3	5	1.5	3.26667	3	2.5	3.2	3	2.6	4	4	4	4
164	2	45	1	1	2	2	2	20.5049	1	2	0	1	2	12.2	1	9.6	1	4.6	1	8.1	1	16	1	0.79	1	78.01	1	#NULL!	#NULL!	5	3	4	3	1	3.46667	2.5	2.25	2.2	2.8	2.4	4.4	4.67	5	4.4
165	2	62	1	1	2	2	2	31.2452	2	3	7	2	2	11.3	1	8.3	2	7	2	6.7	1	76	2	11.27	2	3.42	2	1.45	1	5	3.5	1	5	1	3.26667	4	2.5	1	3.8	1.8	5	4.83	3.6	3.8
166	1	60	1	2	2	1	1	26.7949	2	2	8	2	2	9.4	2	7.8	2	5.1	1	6.9	1	71	2	11.16	2	4.71	2	1.33	1	4.25	3	3	3.5	5	3.66667	4	3	2.6	3.8	2.8	4	3.83	4	3.6
167	2	74	2	2	2	1	2	25.0399	2	2	5	2	2	9.6	2	8.1	2	6.7	2	7.1	1	64	2	8.09	2	4.88	2	1.65	1	4.5	4	3	4.5	4.5	4.06667	3.5	3	3	3.6	3.2	4	3.83	3.8	4
168	2	60	1	1	2	2	2	24.6548	1	1	5	2	2	9.7	2	8.7	1	5.3	1	6.5	1	66	2	3.42	2	13.64	2	#NULL!	#NULL!	4.5	4.75	1	4	3	3.6	3.25	2.25	2.2	3.2	3	3.6	3.33	2.8	3.6
169	2	67	2	1	2	2	2	23.8751	1	1	0	1	1	12.7	1	9.6	1	3.6	1	7.4	1	15	1	0.48	1	132.84	1	#NULL!	#NULL!	4.5	2.5	3.66667	4.5	2	3.46667	2	2	2	2.6	2	3.4	3.33	2.4	3.8
170	1	54	1	1	2	1	1	26.7698	1	3	7	2	2	11.1	1	8.9	1	4.7	1	6.9	1	71	2	3.68	2	16.29	2	#NULL!	#NULL!	3.75	2	3.33333	3.5	4	3.2	2.75	2	2.6	3	2.8	4	3	3.2	4
172	1	41	1	2	2	2	2	23.7812	1	3	12	3	2	11	1	9	1	5.7	2	6.8	1	100	2	8.83	2	6.7	2	#NULL!	#NULL!	4.75	2.75	3	3.5	5	3.73333	2.75	2.75	3	3.2	3	3.2	3	2.4	2.2
173	2	35	1	1	1	1	1	21.0937	1	2	7	2	2	10.8	2	8.1	2	4.2	1	6.7	1	31	2	1.75	2	29.1	2	#NULL!	#NULL!	4.5	1.5	1	3.5	1	2.4	2.25	2.75	2.6	2.4	2.6	2.8	2.67	3	2.6
174	1	37	1	2	1	1	1	24.3865	1	1	3	1	1	14	1	9.6	1	3.5	1	7.7	1	13	1	0.6	1	104.18	1	#NULL!	#NULL!	5	3.75	2.66667	2.5	5	3.86667	2.25	2.25	3	3.4	2.8	3.4	3.33	3.4	2.6
175	1	70	2	2	2	2	2	24.1672	1	2	7	2	2	13.2	1	76	2	5.1	1	7.8	1	81	2	5.62	2	10.74	2	#NULL!	#NULL!	4.75	1.5	3	3.5	1	2.86667	2.75	2.75	2.8	3	2.8	3.8	3.83	3.4	3.6
176	2	65	2	2	2	1	2	15.7943	1	3	10	3	3	12.2	1	9.8	1	3.1	2	8.4	2	38	2	2.21	2	29.5	2	#NULL!	#NULL!	4.75	1	2.33333	3	5	3.06667	3	2.5	2.4	3.8	2.4	2.8	2.33	2.6	3
177	2	38	1	1	2	1	2	24.1415	1	3	8	2	1	16.8	1	9.2	1	3.3	2	6.9	1	12	1	0.65	1	98.57	1	#NULL!	#NULL!	3.5	1	1	5	3	2.46667	2.25	1.75	2	3	2	3.6	3	3.4	4.6
178	2	30	1	2	2	1	2	22.231	1	2	5	2	1	15.8	1	9.6	1	3.8	1	7.2	1	14	1	0.99	1	82.12	1	#NULL!	#NULL!	4.75	1.25	1.33333	4	1	2.53333	1.75	1.5	1.4	2.6	2.2	1.6	3	3.8	2.4
179	2	47	1	1	2	1	2	27.2392	1	2	12	3	2	10.6	2	6.3	2	8.8	2	5.5	2	117	2	8.62	2	5.25	2	#NULL!	#NULL!	5	2	3	5	2	3.4	3	2	2.8	2.8	2.8	4	3	3.2	4
180	1	51	1	1	2	1	1	25.7812	1	1	4	1	2	12.3	1	10	1	3.6	1	8.9	2	30	2	1.83	2	31.6	2	#NULL!	#NULL!	5	2.5	2	2.5	1.5	2.93333	2.75	2.5	2.2	3	3	2	2.67	3	3
181	1	74	2	1	2	2	2	23.2254	1	3	4	1	1	16.9	1	9	1	3.3	2	7.2	1	13	1	1.13	1	68.15	1	#NULL!	#NULL!	5	3	4.33333	5	2	3.93333	1.75	1.25	2	2.4	1.6	3.4	1.67	1.6	3
182	2	36	1	1	2	1	2	26.7036	1	2	7	2	3	12.1	1	8.9	1	3.5	1	7.3	1	19	1	1.73	2	39.36	2	#NULL!	#NULL!	5	2.75	3	3.5	2.5	3.46667	3.25	2.25	2.2	3.4	2.4	3.8	3.67	3	3.6
183	1	43	1	1	2	1	1	25.8065	1	1	2	1	1	11.9	1	9.1	1	4.5	1	7.7	1	16	1	0.83	1	68.99	1	#NULL!	#NULL!	5	2.75	3	2.5	4	3.53333	3	3	3.2	3.2	3	4.2	4.17	4.8	4.6
184	2	36	1	1	2	2	2	23.6244	1	1	0	1	1	8.2	2	9.6	1	3.3	2	8	1	7	2	0.58	1	111.92	1	#NULL!	#NULL!	5	3	2.66667	5	3	3.73333	2.5	2	2.2	3	2.6	3.4	3.33	3	3.6
185	1	50	1	2	1	1	2	22.4996	1	3	8	2	2	10	2	9.7	1	4.3	1	7.3	1	24	2	1.22	1	63.13	1	#NULL!	#NULL!	5	4.5	3.33333	5	4.5	4.46667	3	3	3.8	3.2	3.2	3.4	3	3.6	4.4
186	1	45	1	1	1	1	2	25.0135	1	3	6	2	1	11.9	1	8.6	1	3.4	2	6	2	14	1	0.79	1	106.87	1	#NULL!	#NULL!	4.25	3	2.66667	3.5	3.5	3.4	2.75	2	2.2	2.8	3	3.6	3.17	3.2	2.8
187	2	76	2	1	2	2	1	20.1726	1	1	2	1	2	11.1	1	9.1	1	2.3	2	6.8	1	8	1	0.93	1	58.61	2	#NULL!	#NULL!	3.75	2.75	2	3.5	2.5	2.93333	3.25	2	2	2.8	2	2	2	1.6	1.6
188	1	73	2	2	2	2	2	20.1726	1	1	2	1	2	12.3	1	9.7	1	3.4	2	7.4	1	37	2	1.87	2	35.57	2	#NULL!	#NULL!	5	1.75	2.66667	3	2	3	3.5	3.5	3.2	2.8	3.2	3.2	2.5	2.6	3.2
189	2	44	1	1	2	1	2	21.3382	1	1	2	1	1	12.5	1	8.7	1	3.6	1	6.4	1	12	1	0.32	1	224.33	1	#NULL!	#NULL!	4	2	3	3	3	3	2.5	2.75	2.8	3	3	3	2.83	3	2.8
190	1	62	1	1	2	1	2	28.306	1	1	2	1	1	14	1	9.2	1	2.6	2	6.8	1	16	1	0.9	1	85.5	1	#NULL!	#NULL!	4	1	1	5	2	2.46667	2	2	2	2.8	2.4	2.6	2.83	2.6	2.8
191	2	55	1	1	2	2	2	22.6562	1	2	6	2	2	9.8	2	9.2	1	5.5	1	7.1	1	51	2	2.9	2	17.18	2	#NULL!	#NULL!	4.75	2	1	3	1	2.53333	2	2	2	2.2	2.2	3	3.17	3.4	4
192	2	40	1	1	1	1	2	35.8836	2	2	9	2	2	11.9	1	9.6	1	3.1	2	7.3	1	48	2	2.14	2	25.4	2	#NULL!	#NULL!	4	1.25	1	3	5	2.66667	2.5	2	1.8	2.6	2.4	4.2	3	2.4	3.4
193	2	68	2	1	2	2	2	35.4564	1	2	5	2	3	13.7	1	9.4	1	3	2	7.8	1	21	1	1.04	1	53	2	#NULL!	#NULL!	5	2	3.33333	5	1.5	3.4	2.25	2	3	3	2.8	3	3	3.2	4
194	1	56	1	1	2	1	2	19.1001	1	1	2	1	1	11.5	1	9.2	1	2.8	2	7.4	1	7	2	1.1	1	65	1	#NULL!	#NULL!	5	1.75	3	4	1	3.06667	2.5	2	2.4	3.6	2.4	3.6	3.5	3.4	4
195	2	53	1	2	2	2	2	26.1719	1	2	5	2	2	8.8	2	8.1	2	4.2	1	7.5	1	46	2	7.51	2	5.88	2	#NULL!	#NULL!	4	3.75	4	3	5	3.93333	3	2.75	2.8	2.8	2.8	2.8	3	3.4	3.4
196	1	70	2	2	2	2	1	24.3418	2	3	10	3	2	10.9	2	8.1	2	5.8	2	6.9	1	48	2	13.65	2	3.64	2	#NULL!	#NULL!	5	5	5	1.5	2	4.13333	3	3	3	3	3	3.4	3.17	2.8	3.4
197	2	88	2	1	1	2	2	23.7812	1	1	9	2	2	9.5	2	8.7	1	4.9	1	7.1	1	28	2	1.91	2	24.8	2	#NULL!	#NULL!	2.5	4.5	2	3.5	3.5	3.2	3	2.75	2.2	3.2	3	3.8	3.83	4	4
198	1	37	1	2	2	1	2	21.4619	1	1	2	1	2	16.3	1	9.2	1	3.3	2	6.8	1	11	1	0.7	1	126	1	#NULL!	#NULL!	5	3	4	4.5	4	4.06667	2.75	2.5	2.8	3.2	3	4	3.83	4	4
199	1	19	1	1	2	1	2	23.1206	1	1	0	1	1	15.1	1	9.2	1	3.4	2	7.5	1	9	1	0.91	1	107	1	#NULL!	#NULL!	5	2.75	2.33333	5	1.5	3.4	2	1.75	2.2	3.8	2	3.6	3.67	3.4	3.6
200	2	49	1	1	2	1	2	23.2446	1	3	8	2	2	11.3	1	9	1	4.8	1	7.1	1	40	2	1.69	2	32.16	2	#NULL!	#NULL!	4.75	3	3	3.5	3	3.53333	1.75	2	2	2.2	2.2	2.8	2.67	2.4	2.4
201	2	46	1	2	2	1	2	21.5645	1	1	3	1	1	13.7	1	8.9	1	2.6	2	7.1	1	12	1	0.66	1	96.4	1	#NULL!	#NULL!	5	3	5	4.5	1	3.86667	2.75	2.25	2.4	2.4	2	2.4	2.5	3	2.8
202	1	35	1	2	1	1	2	23.2438	1	2	5	2	1	14.7	1	8.9	1	3.4	2	7.6	1	15	1	1.33	2	61.1	1	#NULL!	#NULL!	4.75	2.25	2.66667	4.5	4	3.53333	2.25	2.5	2	2.6	2.8	2.2	2	3.4	2.8
203	1	28	1	2	1	1	2	29.0657	1	1	0	1	1	15.3	1	8.7	1	3.2	2	7.4	1	9	1	0.69	1	147	1	#NULL!	#NULL!	3.5	3.5	5	4.5	3.5	3.93333	2	2.75	3	2.8	2.8	4	4	4	4
204	2	48	1	1	2	2	2	32.4062	1	1	4	1	2	10.5	2	8.5	1	3.1	2	6.3	2	48	2	2.62	2	19.4	2	#NULL!	#NULL!	4.75	3	3	4.5	3	3.66667	3.25	2.75	2.8	3.2	3	4.2	4	3.4	3.6
205	2	68	2	1	2	2	2	26.2227	1	2	5	2	2	10	2	9.7	1	4.1	1	8	1	16	1	1.13	1	46	2	#NULL!	#NULL!	4.75	3	3.66667	5	4	4	3.5	3	3	3.4	3	3.4	3.5	3	2.6
206	1	22	1	1	2	1	1	22.9854	1	1	4	1	1	15.7	1	9.9	1	3.9	1	7.8	1	14	1	1.25	1	72.23	1	#NULL!	#NULL!	5	2.75	1.66667	3	1	2.93333	2.5	2.75	2.8	3	2.6	3.8	3.83	3.8	3.2
207	2	68	2	1	2	2	1	19.8791	1	1	4	1	2	11.6	1	9.2	1	3.3	2	6.3	2	13	1	0.44	1	142.2	1	#NULL!	#NULL!	4.5	2.75	2	5	2	3.26667	2	2	2.4	3	3.4	2.8	2.83	3.8	3.2
208	1	41	1	2	1	1	2	22.5981	1	2	2	1	1	13	1	8.9	1	4.4	1	6.9	1	7	2	0.6	1	89	1	#NULL!	#NULL!	5	3	2.66667	4.5	2	3.53333	2.75	2.75	2.6	3	3	3.2	3.17	3.4	3.8
209	2	80	2	1	2	2	2	26.0375	1	1	7	2	2	13.1	1	9.2	1	2.8	2	7	1	11	1	0.87	1	62.6	1	#NULL!	#NULL!	5	2.5	2.66667	4.5	4.5	3.73333	3	2	2.2	3.2	2.8	2.8	2.5	2.4	2.6
210	2	46	1	2	2	2	2	20.7031	1	1	1	1	2	12.9	1	9.5	1	4.7	1	6.8	1	17	1	0.72	1	87.2	1	#NULL!	#NULL!	4.5	1	3.33333	5	1	2.93333	3	2.5	2.6	3	2.8	2.6	2.5	2.6	2.6
211	1	36	1	2	1	1	2	30.4053	1	1	3	1	2	13.5	1	9.9	1	3.2	2	8.1	1	19	1	1.38	2	58.3	2	#NULL!	#NULL!	4.75	1.75	1.33333	2.5	4.5	2.93333	1.5	1.75	1.4	2.2	2.4	2	2.33	3.6	2.6
212	2	53	1	1	2	1	2	23.3726	1	3	8	2	2	11	1	9.4	1	5.6	2	6.6	1	67	2	2.71	2	18.5	2	#NULL!	#NULL!	4	1	1	5	4	2.73333	2.25	2.25	3	3	2.8	3.6	2.67	2.8	4
213	1	74	2	1	2	2	2	28.0557	1	3	3	1	1	15.4	1	9.3	1	2.8	2	6.7	1	16	1	1.02	1	77.95	1	#NULL!	#NULL!	5	1	2.66667	4	4	3.2	2.5	2.75	2.8	3	2.8	3.4	2.17	2.2	3.6
214	2	65	2	1	2	2	2	15.0657	1	3	12	3	2	10.5	2	9.3	1	3.2	2	7.1	1	20	1	1.04	1	54	2	#NULL!	#NULL!	2.75	2.75	3	4.5	1	2.8	3	2.75	3	3	2.6	3.8	3.5	3.2	3
215	2	53	1	1	2	2	2	26.1719	1	1	5	2	2	8.8	2	8.2	2	3.9	1	7.3	1	67	2	6.57	2	6.61	2	#NULL!	#NULL!	5	5	5	3	3	4.46667	3.25	3.25	3	3.2	3.2	3.6	3.33	3	3.4
216	1	47	1	2	2	1	2	20.5151	1	1	4	1	1	15.5	1	9.8	1	3	2	7.8	1	17	1	1.14	1	68.8	1	#NULL!	#NULL!	5	3	2	3.5	3	3.4	2.25	2.25	2.6	3.6	2.8	3.4	3.33	3.6	3.6
217	2	82	2	1	2	2	2	25.1532	1	1	15	3	3	9.8	2	8.7	1	3.2	2	6.3	2	10	1	1.01	1	52.74	2	#NULL!	#NULL!	5	2.75	2.66667	4.5	3.5	3.66667	3	2.25	3	3	2.8	3	2.17	2	2.6
218	2	29	1	2	2	1	2	21.5645	1	1	3	1	1	#NULL!	#NULL!	#NULL!	#NULL!	#NULL!	#NULL!	#NULL!	#NULL!	#NULL!	#NULL!	#NULL!	#NULL!	#NULL!	#NULL!	#NULL!	#NULL!	4	2	2	4.5	2	2.86667	3	2.5	2.4	3	2.8	3.4	3.5	4	4
219	2	83	2	1	2	2	2	30.4811	1	1	4	1	2	11	1	9.1	1	3.6	1	7.3	1	21	1	1.29	1	39.6	2	#NULL!	#NULL!	4.25	2.5	1	4.5	2	2.86667	3	2.25	2.2	3	2.6	3.6	3.83	3.2	3.4
220	2	60	1	1	2	2	2	31.0446	1	1	3	1	2	13.9	1	9.6	1	3.7	1	7.7	1	26	2	1.02	1	52	2	#NULL!	#NULL!	4.5	2.25	2	5	2	3.13333	2.75	2.5	2.2	3.4	2.4	3	2.5	2.4	3.2
221	2	40	1	1	2	2	2	26.1427	1	3	8	2	3	10.1	2	8.9	1	3.1	2	6.5	1	33	2	0.99	1	52.81	2	#NULL!	#NULL!	4.25	1	1.66667	5	2.5	2.73333	3	2.25	2.4	3	2.2	2.6	2.17	2.2	2.8
222	1	62	1	1	2	1	2	23.4236	1	3	8	2	2	7.9	2	8.4	2	4.7	1	6.7	1	57	2	6.76	2	8.34	2	#NULL!	#NULL!	3.25	2.25	3	3	4	3	3.25	2.75	2.2	3.2	2.6	3.2	3.5	2.8	2.4
223	2	62	1	1	2	2	2	24.7676	1	2	6	2	1	13.7	1	10	1	3.4	2	7	1	23	1	0.71	1	81	1	#NULL!	#NULL!	4.5	2.5	2	5	3.5	3.4	2	3	2.8	2.6	2.4	2.6	3	2.6	2.8
224	2	51	1	2	1	2	2	21.875	1	1	2	1	2	14.1	1	9	1	3.6	1	7.4	1	12	1	1.06	1	54.65	2	#NULL!	#NULL!	4.75	2.5	2.66667	4	3	3.4	2.75	2.5	2.2	3	2.6	2.8	2.33	2.4	3.2
225	1	19	1	1	2	1	2	25.5593	1	2	2	1	2	16.4	1	9.7	1	3.4	2	8.2	1	18	1	1.72	2	42.13	2	#NULL!	#NULL!	2.5	3	3	4.5	3	3.06667	2	2.5	2.4	3	2.8	3.2	4	4.2	4.4
226	1	72	2	1	2	2	2	29.6875	1	2	9	2	2	13.2	1	8.8	1	3.5	1	7.1	1	45	2	2.05	2	32.08	2	#NULL!	#NULL!	4.75	1	1.66667	3.5	2	2.6	2.5	2.25	2.2	2.8	2.4	3.4	2.83	1.8	2.4
227	2	46	1	1	2	1	2	29.3848	1	3	12	3	3	10.2	2	8.9	1	4.2	1	7.4	1	23	1	1.16	1	50.29	2	#NULL!	#NULL!	4.75	3	3	4	4	3.73333	3	3.25	3	3	3	2.8	2.67	2.6	2.4
228	1	53	1	1	2	2	2	21.9713	1	1	3	1	2	15.4	1	10.1	1	3.5	1	7.5	1	10	1	0.81	1	100	1	#NULL!	#NULL!	5	2.75	2.66667	5	1	3.4	3	2.25	2.8	3	3	2.8	2.83	2.4	3
229	2	46	1	1	2	1	2	21.9713	1	1	2	1	2	13.3	1	9.4	1	3.7	1	6.9	1	33	2	1.33	2	51.7	2	#NULL!	#NULL!	3.5	1.5	2.33333	4	3	2.73333	3	3	3	3	2.8	2.8	2.83	3	3
230	1	19	1	1	2	1	2	24.7721	1	1	2	1	1	16.4	1	9.6	1	4.7	1	8.4	2	19	1	0.79	1	126	1	#NULL!	#NULL!	4.75	1.5	1	4.5	1	2.6	3	2.25	2.2	3	2	3.4	2.67	2.8	2.8
231	1	44	1	2	2	1	2	23.5294	1	1	4	1	1	15.4	1	9.4	1	3.4	2	8.1	1	12	1	0.96	1	85	1	#NULL!	#NULL!	5	4	3.33333	4.5	4.5	4.26667	1	3	3	4	2.8	3.2	3.17	4.2	3.8
232	2	63	1	1	1	2	2	27.8293	2	3	9	2	2	10	2	7.6	2	5.8	2	#NULL!	#NULL!	45	2	9.6	2	4	2	#NULL!	#NULL!	4	2.75	3.33333	5	4.5	3.73333	3.75	3.25	3.8	3.6	3.4	4.4	4	4.2	4.2
233	1	54	1	2	2	1	2	24.6755	2	3	4	1	2	12.2	1	8.7	1	5.2	1	6.7	1	49	2	12	2	4	2	#NULL!	#NULL!	5	2.5	3	5	3.5	3.73333	4	4	4	4.2	4	4.2	4.33	4.4	4.8
234	2	54	1	1	2	2	2	19.9481	2	3	9	2	2	8.6	2	8.4	2	6	2	6.6	1	59	2	9	2	4	2	#NULL!	#NULL!	4.75	2.5	2	5	2	3.26667	3	3	3.2	3	2.8	4	3.83	3.2	4
235	1	44	1	1	2	1	1	28.2006	2	3	7	2	2	8.1	2	8.4	2	6.9	2	6.1	2	87	2	18.3	2	2.8	2	#NULL!	#NULL!	4.25	2.25	2	4.5	3	3.13333	2.75	2	2.2	3	2.6	2.6	2.5	2.4	2.4
236	2	39	1	1	1	1	2	18.8271	2	2	6	2	2	10.5	2	9.6	1	5.6	2	6.8	1	53	2	13	2	3	2	#NULL!	#NULL!	5	3	2.66667	3	4	3.6	3	2.5	2.8	3	3.2	3.6	3.67	3.4	3.8
237	1	50	1	2	2	1	2	23.5989	2	3	6	2	2	12	1	8.8	1	4.5	1	6.4	1	60	2	15.3	2	3.4	2	#NULL!	#NULL!	4.75	2.75	2	3	4	3.33333	3	2.5	3	3	2.2	4.2	3.5	3.8	4.4
238	1	36	1	2	2	1	2	21.9713	1	3	6	2	1	15.1	1	9.3	1	2.5	2	7.7	1	15	1	1.1	1	71	1	#NULL!	#NULL!	5	1.75	2	3.5	1	2.8	3.25	3	2.8	3.4	3	2.8	2.67	2.6	2.4
239	1	23	1	2	2	1	2	22.46	1	3	3	1	2	15.2	1	9.3	1	3.5	1	7.3	1	23	1	1.4	2	60	1	#NULL!	#NULL!	5	3.5	3	5	3.5	4	4	3.75	3.8	4	3.8	4	4	4	4
240	1	46	1	2	1	1	2	23.8895	1	3	8	2	2	11	1	9.5	1	3	2	7	1	13	1	1.13	1	69	1	#NULL!	#NULL!	4.75	2.5	1	5	4	3.33333	3	2.5	2.4	2.4	3	4	4	4	4
241	1	31	1	2	1	1	2	23.2438	1	3	2	1	1	15.9	1	8.4	2	3.3	2	6.2	2	19	1	1.3	1	64	1	#NULL!	#NULL!	3.5	2.5	2	4	3	2.93333	2.75	2.75	3	3	3	3.2	2.67	2.8	2.8
242	2	54	1	1	2	1	2	21.6311	1	3	11	3	2	12.7	1	10	1	4.2	1	8.1	1	30	2	1	1	5.2	2	#NULL!	#NULL!	4.25	3.5	3	5	1	3.46667	2.5	2	3	3	2.8	3	3.33	3	3.8
244	2	54	1	1	2	2	2	34.1749	1	1	4	1	2	13.9	1	8.1	2	3.1	2	6.5	1	31	2	2.1	2	21.7	2	#NULL!	#NULL!	4.75	1	2.33333	3	1	2.53333	2.75	2.25	3	3	2.4	2.4	1.5	1.4	1.6
246	1	37	1	2	2	1	2	24.539	1	1	1	1	1	16.9	1	9.1	1	3.7	1	7.9	1	14	1	0.9	1	86	1	#NULL!	#NULL!	4.75	2	2	3	2	2.86667	1	2.25	2.2	2.4	2.6	1.6	2.17	2.4	2.2
247	2	62	1	1	2	2	2	23.833	1	2	3	1	2	12.5	1	8.9	1	2.5	2	7.2	1	14	1	0.7	1	76	1	#NULL!	#NULL!	3.75	1.25	2.33333	5	2.5	2.8	2.5	2.25	2.4	2.8	3	2.2	2.67	2.4	2.4
248	1	57	1	1	2	1	2	25.1024	1	1	2	1	2	11.5	1	9.2	1	3.8	1	7.4	1	25	2	1.3	1	54.4	2	#NULL!	#NULL!	4.25	1.5	2.33333	3	3.5	2.86667	2.5	2	2.4	2.8	3	3	3.67	2.6	3.2
249	2	57	1	1	1	2	2	23.5304	2	1	4	1	2	8.3	2	8.2	2	5	1	5.4	2	59	2	4.1	2	11	2	0.26	2	4.25	2.5	2.66667	5	2	3.26667	3	1.5	2.8	2.2	2	3	1.17	1.2	2
250	2	59	1	1	2	2	2	29.9116	2	3	9	2	3	9.9	2	10.4	2	4.5	1	7.9	1	55	2	4.9	2	9.1	2	1.49	1	4	3	2.33333	4.5	4	3.46667	2.25	2	2.6	2.8	2.4	2.8	3.5	2.8	3
251	1	82	2	1	2	2	2	20.0115	2	3	4	1	2	9.7	2	8.4	2	3	2	6	2	62	2	6.9	2	7.7	2	1.58	1	4.75	3	3	5	1	3.46667	2.75	2.5	2.8	3	2.8	3.4	2.67	2.8	3.4
252	1	60	1	2	2	2	2	28.3937	2	2	7	2	2	10.7	2	9.5	1	9.7	2	7.6	1	106	2	16.1	2	3	2	1.23	1	5	3.5	3.33333	4.5	2	3.8	3	3	3	3	3	3.2	3	3.2	3
253	1	73	2	2	2	2	2	22.2291	2	3	5	2	3	9.9	2	8.4	2	6.1	2	7	1	58	2	8.9	2	5.8	2	1.56	1	5	2.75	3	5	3	3.73333	3	2.75	3	3	3	3.2	3	2.8	3.2
254	1	89	2	1	2	2	2	23.7253	2	3	4	1	2	10.1	2	7.3	2	2.5	2	5.6	2	72	2	5.3	2	10	2	1.58	1	5	2.75	3.66667	5	2	3.73333	3	2.75	3	3	3	2.4	1.33	1.4	2
255	1	55	1	1	2	2	1	18.6851	2	3	9	2	2	9.4	2	9.6	1	6	2	6.3	2	52	2	9.5	2	5.7	2	1.62	1	4.75	2.5	3	5	2	3.46667	3	2.75	3	3	3	3.2	3	2.6	3
256	2	59	1	1	2	2	2	16.8158	2	3	7	2	3	10.9	2	8.4	2	3.4	2	6.8	1	77	2	9.3	2	4.6	2	1.98	1	4.75	3.5	3	5	4.5	4.06667	3.25	2.75	3	3.2	2.8	4	3.5	3.2	3.8
257	1	53	1	2	2	1	1	23.218	2	3	8	2	2	11.3	1	8.3	2	8	2	6.7	1	86	2	12	2	4	2	1.17	2	3.75	2.5	2.33333	3.5	5	3.26667	2.75	2.25	3	2	3.2	2	3.17	3.2	4
258	1	64	1	1	2	1	2	31.5115	2	2	7	2	3	11.4	1	8.4	2	5.6	2	7.1	1	79	2	9.4	2	5.6	2	1.32	1	4.75	3.5	3	5	4	4	3	2.25	3	3.2	2	3.2	2.33	2.2	3
259	1	66	2	2	2	2	2	26.2012	2	2	8	2	3	8.2	2	8.6	1	4.7	1	6.8	1	72	2	11	2	4	2	1.32	1	4.5	2	3.66667	3	5	3.53333	2.75	2.5	3.2	2.8	2.8	3.4	2.67	2.8	2.6
260	1	65	2	1	1	2	2	26.8871	2	1	5	2	2	9.1	2	7.9	2	5.3	1	7.2	1	48	2	6	2	8	2	1.12	2	5	3.75	3.33333	5	4.5	4.26667	2.75	2.75	2.6	3	2.8	3.4	2.83	2.8	3.4
261	1	80	2	1	2	2	2	24.3359	2	1	4	1	2	8.4	2	8	2	5.6	2	6.4	1	61	2	5.7	2	9.5	2	1.28	1	4.75	3	3.33333	5	4	3.93333	3	2.5	3	3	2.6	3.4	2.67	2.8	3
262	2	77	2	1	1	2	2	22.6953	2	2	15	3	3	10.8	2	8.6	1	4.8	1	6.2	2	46	2	6.7	2	5.9	2	1.63	1	5	2.5	3	5	4	3.8	3	2.25	3	3	3	2.8	2.33	2.6	3
263	2	81	2	1	2	2	2	30.8329	2	2	5	2	3	9.9	2	8.1	2	7.1	2	7.1	1	91	2	10	2	3	2	1.37	1	4.75	2.5	2	4.5	3	3.33333	3	2	3	4	1.4	3	1.67	1.2	2
264	1	40	1	1	2	2	2	23.2115	2	1	7	2	2	11.2	1	9.3	1	5.6	2	7.1	1	80	2	10	2	5	2	1.31	1	5	3	3	3	1	3.26667	3	2.25	2.6	3	3	1.8	1.83	2	2
265	2	70	2	1	2	2	2	22.6172	2	3	9	2	3	9.8	2	7.8	2	5.1	1	5.6	2	66	2	7.7	2	5.1	2	1.74	1	4.75	3	1	3.5	2	3	3	1	1	2	1	1.2	1	1	1.4
266	2	82	2	1	2	2	2	15.7812	2	2	11	3	2	9.5	2	8.5	1	4.5	1	6.2	2	40	2	7	2	5.5	2	1.67	1	4.75	2.75	1	5	3	3.26667	3.5	2.25	3	3.2	1	2.2	1	1	1.6
267	1	46	1	2	2	1	2	24.5739	2	3	14	3	2	10.3	2	8.8	1	5.8	2	7	1	81	2	14.6	2	3.6	2	1.43	1	5	2.25	2	4	3.5	3.33333	3.25	2.75	3	3	3	4	3.5	3	4
268	1	78	2	1	2	2	2	20.7008	2	1	4	1	2	9.1	2	6.8	2	2.2	2	6	2	23	1	4.9	2	11.8	2	1.24	1	5	2.25	2.33333	5	5	3.73333	3	2	2.6	3.6	3	2.8	2.67	2.2	3
269	1	57	1	1	2	2	2	21.8407	2	1	7	2	2	10	2	8.6	1	4.4	1	6.4	1	47	2	12.4	2	4.2	2	1.34	1	4.75	3	3	5	1	3.46667	3	2.25	3	3	2.6	2.2	2	1.4	2.4
270	1	52	1	1	2	2	1	23.7799	2	2	9	2	3	10.4	2	7.1	2	4.1	1	6.2	2	78	2	13.8	2	3.8	2	1.35	1	4.5	2.5	3	1	1	2.73333	3	2.5	3	3	3	3	3	2.6	3
271	1	52	1	1	2	1	2	19.2974	2	3	12	3	2	10.8	2	9.7	1	6.7	2	7.4	1	72	2	12	2	3	2	#NULL!	#NULL!	4.5	2.75	3	3.5	3	3.4	2.75	2.5	2.8	2.2	3	2.8	2.33	2.2	3.2
272	1	47	1	1	2	1	2	26.0617	2	2	11	3	2	10.8	2	9.1	1	5.6	2	6.4	1	70	2	19	2	2	2	#NULL!	#NULL!	4.75	3	1	4	3	3.2	3	2.5	3	3	2.6	3.6	3	3.2	3.6
273	1	43	1	1	1	1	2	29.4029	2	2	9	2	2	10.8	2	9	1	6.3	2	8.1	1	73	2	14	2	3	2	#NULL!	#NULL!	4.75	2.25	3.33333	5	3.5	3.66667	3	2.5	2.8	2.6	2.8	3.8	3.33	3.2	4
274	2	62	1	1	1	2	2	28.8275	2	3	10	3	2	13	1	8.9	1	3.7	1	6.7	1	54	2	11	2	3	2	#NULL!	#NULL!	4.25	1.75	2	4.5	2	2.86667	3	2.75	2.8	3	2.6	3.2	2.67	2.2	3
275	1	46	1	1	1	2	2	28.7268	2	2	12	3	2	11.1	1	9.5	1	5.1	1	7.1	1	57	2	11.4	2	4	2	#NULL!	#NULL!	4.75	3.5	4	5	3	4.06667	3	2.75	3	3.2	3	4	3.67	3.4	4
276	1	52	1	2	2	1	2	28.8415	2	2	13	3	2	8.7	2	9.7	1	7.3	2	7.4	1	55	2	12	2	4	2	#NULL!	#NULL!	5	2.5	4	5	2	3.73333	3.25	2.75	3	3.8	3	3.6	3.67	3.6	4
277	2	53	1	1	2	2	2	22.4913	2	2	14	3	3	10.5	2	8.3	2	3.3	2	7	1	60	2	14	2	3	2	#NULL!	#NULL!	5	2.25	2	4.5	2	3.2	3.25	3	3	3.2	3	3.4	3	2.8	3.2
278	2	58	1	1	2	2	2	20.4444	2	2	7	2	2	9.1	2	8.4	2	2.2	2	5.9	2	24	2	5	2	7	2	#NULL!	#NULL!	4.75	2.25	3	5	2.5	3.46667	3	2.5	3	3	2.8	4	2.33	2.6	3.4
279	2	43	1	1	2	2	2	19.3337	2	2	5	2	3	9.9	2	9.3	1	4.2	1	7.9	1	40	2	7	2	6	2	#NULL!	#NULL!	4.75	3	2	3.5	4	3.46667	3	1.75	2.4	3	1.6	4	3.33	3.8	4
280	1	52	1	1	2	1	2	24.3418	2	3	9	2	2	11	1	7.9	2	5.7	2	6.8	1	45	2	13	2	3	2	#NULL!	#NULL!	4.25	2.5	3	4.5	3	3.4	3	2	2.2	3.2	2.2	3	2.83	2.4	2.6
281	1	62	1	1	2	2	2	24.0882	2	3	12	3	2	12.7	1	9.7	1	4.2	1	8.5	2	57	2	14	2	3	2	#NULL!	#NULL!	4.75	2.5	2	5	4	3.53333	3	2.25	2.8	3	2.6	3.6	3.17	3	3.4
282	1	55	1	2	2	1	2	27.0416	2	2	6	2	2	10.9	2	7.4	2	5.2	1	7.5	1	53	2	10.7	2	5	2	#NULL!	#NULL!	3.25	2	2.33333	3	3	2.66667	3	2.25	2.2	3.6	2	2.8	3.33	2.4	2.2
283	1	60	1	1	2	2	2	21.3382	2	3	7	2	2	11.8	1	8.7	1	5.4	1	6.8	1	65	2	12.3	2	4.2	2	#NULL!	#NULL!	4.75	3.25	4	5	4	4.13333	3	2	2.2	2.8	2	3.4	3	3.4	3.4
284	2	46	1	2	2	2	2	21.0937	2	3	7	2	2	10.3	2	8.8	1	4	1	6.8	1	59	2	10.7	2	3.8	2	#NULL!	#NULL!	3.75	3.25	3.33333	5	5	3.86667	2.75	2	2.4	2.6	2.4	1.8	2.33	2	2.6
285	1	40	1	2	2	1	2	22.8571	2	2	12	3	2	9.9	2	8.6	1	6.4	2	6.3	2	65	2	15.8	2	3.4	2	#NULL!	#NULL!	4.25	1.75	1.66667	4	3	2.86667	2.75	2.5	2	2.6	3	3	3.5	3.4	3.4
